# Supplementary material
Source: PubMed Central journal article supplement (PMC3711335)
Supplement: supp_M113.455451_jbc.M113.455451-1.pdf [file supp_M113.455451_jbc.M113.455451-1.pdf]

**Supplementary Table 1.** Plasmids and primers used in this study.

| Plasmid name                | Wickens archive name | Genbank accession # of insert (AA #s of partial inserts) | Amino acids mutated/deleted    | Method made               | Cut Site | Primer Sequence                                                                   |
|-----------------------------|----------------------|----------------------------------------------------------|--------------------------------|---------------------------|----------|-----------------------------------------------------------------------------------|
| pCS2+3HA:MS2-XTUT7-C        | CPL7                 | KC493152                                                 | None                           | RE digests and ligation   | Stul     | GAAGGCCTGTTGAGAAACCAATGAAC TG                                                     |
|                             |                      |                                                          |                                |                           | XhoI     | CCGCTCGAGTCA TGAGAGCCACACAAGAAATC                                                 |
| pCS2+3HA:MS2-XTUT7-C-DADA   | CPL8                 | KC493152                                                 | D149A, D151A                   | SDM                       | NA       | GCTTTGGCTTCAAACAGAGTGCTCTAGCTATCTGCATGACTTTTGATGG                                 |
|                             |                      |                                                          |                                |                           | NA       | CCATCAAAGTCATGCAGATAGCTAGAGCACTCTGTTTGAAGCCAAAGC                                  |
| pCS2+3HA:MS2-XTUT4-C        | CPL12                | KC493153                                                 | None                           | RE digests, ligation, SDM | XhoI     | NA                                                                                |
|                             |                      |                                                          |                                |                           | XbaI     | NA                                                                                |
| pCS2+3HA:MS2-XTUT7-C-ΔZ1    | CPL42                | KC493152                                                 | 56-69                          | SDM                       | NA       | GGCAAGCTGCCTACAGTTGTGCCAGAAGATTTC AAGAAAATT                                       |
|                             |                      |                                                          |                                |                           | NA       | AATTTCTTGAATCTTCTGGCACA ACTGTAGGCAGCTTGCC                                         |
| pCS2+3HA:MS2-XTUT7-C-ΔZ123  | CPL46                | KC493152                                                 | 56-69; 437-451; 543-556        | SDM                       | NA       | GAACTTGCTCCCAATGATCGACCCATGAGAAGAAA CAGAGTG                                       |
|                             |                      |                                                          |                                |                           | NA       | CACCTGTTTCTTCTCATGGGTCGATCATTGGGAGCAAGTTC                                         |
|                             |                      |                                                          |                                |                           | NA       | AGAGATGTGAGGGAGAAACGCCACAGTACAAAGGCCAGTA                                          |
|                             |                      |                                                          |                                |                           | NA       | TACTGGGCTTTGTACTGTGGGCGTTTCCCTCACATCTCT                                           |
| pCS2+3HA:MS2-XTUT7-C-ΔBR    | CPL47                | KC493152                                                 | 453-470                        | SDM                       | NA       | AAAATTGGCCACTTATGAAGGACTGTCCCTACCCGAGGCAAGAGTCCAAGAAAGACA                         |
|                             |                      |                                                          |                                |                           | NA       | TGCTTTCTTGGACTTCTTGCCTCGGGTAGGGACAGTCTTATAAAGTGCCCAATTT                           |
| pCS2+3HA:MS2-XTUT7-ΔZ123ΔBR | CPL48                | KC493152 (78-425)                                        | None                           | RE digests and ligation   | Stul     | GCATAGGCCTCTTGATCCTTTGCCTCTCTTAC                                                  |
|                             |                      |                                                          |                                |                           | XhoI     | GCATCTCGAGTCACTTCAGGATCGAAAAATATTC                                                |
| pCS2+3HA:MS2-XTUT7-FL       | CPL69                | KC493151                                                 | None                           | RE digests and ligation   | XhoI     | CCGCTCGAGGTGCTGCCAAACAAGTCAAAC                                                    |
|                             |                      |                                                          |                                |                           | XbaI     | GATCTAGATCACTTCTGATTGGCTTTTCC                                                     |
| pCS2+3HA:MS2-XTUT7-FL-DADA  | CPL70                | KC493151                                                 | D1041A; D1043A                 | SDM                       | NA       | GGCTTTGGCTTCAAACAGAGTGCTCTTGAATCTGCATGACTATTGATGGT                                |
|                             |                      |                                                          |                                |                           | NA       | ACCATCAATAGTCATGCAGATTGCAAGAGCACTCTGTTGAAGCCAAAGCC                                |
| pCS2+3HA:MS2-XT-TUT7-C      | CPL71                | KC493151 (837-1514)                                      | None                           | RE digests and ligation   | XhoI     | GATCTAGACAATAAGTTTGTATGATGAGGAG                                                   |
|                             |                      |                                                          |                                |                           | XbaI     | GATCTAGATCACTTCTGATTGGCTTTTCC                                                     |
| pCS2+3HA:MS2-XT-TUT7-C-DADA | CPL72                | KC493151 (837-1514)                                      | D1041A; D1043A                 | SDM                       | NA       | GGCTTTGGCTTCAAACAGAGTGCTCTTGAATCTGCATGACTATTGATGGT                                |
|                             |                      |                                                          |                                |                           | NA       | ACCATCAATAGTCATGCAGATTGCAAGAGCACTCTGTTGAAGCCAAAGCC                                |
| pCS2+3HA:MS2-GLD2           | CPL73                | NM_001094423                                             | None                           | SDM                       | NA       | GGATTGGTACAAGAATCAGTGATGCAGATTGTGCCTGGTTTAAAAGAG                                  |
|                             |                      |                                                          |                                |                           | NA       | CTCTTTAAAACAGGCACA AATCTGCATCACTGATCTTGTACCAAATCC                                 |
| pCS2+3HA:MS2-GLD2-D242A     | AC079                | NM_001094423                                             | D242A                          | NA                        | NA       |                                                                                   |
| pCS2+3HA:MS2-XTUT7-H1269L   | CPL95                | KC493152                                                 | H377L                          | SDM                       | NA       | GTTATTGAAGACCTTTTGATTTAAATTTGAACCTTGGAGCTGGCTTGTCAAGAAAG                          |
|                             |                      |                                                          |                                |                           | NA       | CTTCTTGACAAGCCAGCTCCAAGGTTCAAATTTAAATCAAAGGGTCTTCAATAAC                           |
| pHMTc-TUT7-BR-WT            | CPL100               | KC493152 (453-540)                                       | None                           | RE digests and ligation   | XbaI     | ATCGAGGAAAACCTGTATTTTCAGGGCGAATTCGGATCCCCAAAATCGGATCTGGTTCCG                      |
|                             |                      |                                                          |                                |                           | NA       | AACGACGGCCAGTGCCAAGCTTGCCTGCAGTGC ACTCAATGATGATGATGATGCTC                         |
| pHMTc-TUT7-BR-R1-6A         | CPL101               | KC493152 (453-540)                                       | R454A; R455A; R457A; R459-461A | SDM                       | NA       | CGTGGATCCCCGAAATTTCCGGGTGCAATGGCAACACGCCGTGGCAGCTGCAAACAATGAGAATGCTGGAACCAAAGATAC |
|                             |                      |                                                          |                                |                           | NA       | GTATCTTTGGTTTCCAGCATTCTATTGTTGCAGCTGCCACGGCGTTTGTGCCATTCGACCCGGGAATCCGGGGATCCAGC  |
| pCS2-XTUT7-C                | CPL102               | KC493152                                                 | None                           | SDM                       | NA       | ttccagattacgctccatgggctaggcctgttgagaacc                                           |
|                             |                      |                                                          |                                |                           | NA       | ggtttccaacaggcctagccatggagcgttaactctggaa                                          |

AA = amino acid

SDM= site directed mutagenesis

NA = not available

RE = restriction digests
